# Supplementary material
Source: publisher figshare collection journal article supplement (https://diabetesjournals.figshare.com/articles/dataset/_/19638696)

**Plasma adrenomedullin, allelic variations in the *ADM* gene, and risk for lower-limb amputation in people with type 2 diabetes**

**Supplemental Material**

- Page 2. Supplemental Table 1. Baseline characteristics of participants by the incidence of LLA and LLRV during follow-up
- Page 4. Supplemental Table 2. Minor and major LLA during follow-up in the SURDIAGENE cohort by baseline plasma MR-proADM
- Page 5. Supplemental Table 3. Correlations of baseline parameters with incident LLA
- Page 6. Supplemental Table 4. Prognostic value of baseline plasma MR-proADM for discrimination and classification of LLA risk during follow-up
- Page 7. Supplemental Table 5. Plasma MR-proADM at baseline by ADM genotype
- Page 8. Supplemental Table 6. ADM genotype by LLA incidence during follow-up
- Page 9. Supplemental Figure 1. A) Structure of the *ADM* gene and location of the SNPs. B) Linkage disequilibrium between the SNPs in the DIABHYCAR cohort
- Page 10. Supplemental Figure 2. Kaplan-Meier curves for the cumulative incidence of LLA during follow-up by *ADM* SNPs

**Supplemental Table 1. Baseline characteristics of participants by the incidence of LLA and LLRV during follow-up**

|                                       | LLA during follow-up |             |         | LLRV during follow-up |             |         |
|---------------------------------------|----------------------|-------------|---------|-----------------------|-------------|---------|
|                                       | No                   | Yes         | p       | No                    | Yes         | p       |
| N (%)                                 | 4264 (97.5)          | 111 (2.5)   | -       | 4171 (95.3)           | 204 (4.7)   | -       |
| Cohort: DIABHYCAR, n (%)              | 2928 (98.9)          | 34 (1.1)    | <0.0001 | 2856 (96.4)           | 106 (3.6)   | <0.0001 |
| SURDIAGENE, n (%)                     | 1336 (94.6)          | 77 (5.4)    |         | 1315 (93.1)           | 98 (6.9)    |         |
| Sex: male, n (%)                      | 2885 (68)            | 98 (88)     | <0.0001 | 2826 (68)             | 157 (80)    | 0.006   |
| Age, y                                | 66 ± 9               | 67 ± 9      | 0.14    | 65 ± 9                | 67 ± 9      | 0.03    |
| Duration of diabetes, y               | 12 ± 9               | 15 ± 10     | <0.0001 | 12 ± 9                | 14 ± 9      | 0.001   |
| BMI, kg/m <sup>2</sup>                | 30.0 ± 5.3           | 30.0 ± 4.2  | 0.93    | 30.1 ± 5.3            | 28.9 ± 4.6  | 0.001   |
| Systolic blood pressure, mmHg         | 141 ± 16             | 143 ± 16    | 0.14    | 141 ± 16              | 141 ± 17    | 0.85    |
| Diastolic blood pressure, mmHg        | 79 ± 10              | 78 ± 11     | 0.18    | 79 ± 10               | 76 ± 12     | <0.0001 |
| Arterial hypertension, n (%)          | 2761 (65)            | 93 (84)     | <0.0001 | 2692 (65)             | 162 (79)    | <0.0001 |
| Current tobacco smoking, n (%)        | 562 (13)             | 17 (16)     | 0.47    | 542 (13)              | 37 (168)    | 0.04    |
| Previous myocardial infarction, n (%) | 369 (8.6)            | 14 (12.2)   | 0.17    | 351 (8.4)             | 32 (15.7)   | 0.0009  |
| Previous stroke, n (%)                | 189 (4.4)            | 8 (7.2)     | 0.16    | 181 (4.3)             | 16 (7.8)    | 0.02    |
| Previous LLA, n (%)                   | 48 (1.1)             | 24 (21.6)   | <0.0001 | 58 (1.1)              | 14 (20.9)   | <0.0001 |
| MR-proADM, nmol/l*                    | 0.41 [0.40]          | 0.81 [0.64] | <0.0001 | 0.41 [0.41]           | 0.56 [0.57] | <0.0001 |
| HbA1c, %                              | 7.8 ± 1.7            | 8.0 ± 1.8   | 0.34    | 7.8 ± 1.7             | 8.0 ± 1.8   | 0.06    |

|                                                     |             |              |         |             |              |         |
|-----------------------------------------------------|-------------|--------------|---------|-------------|--------------|---------|
| HbA1c, mmol/mol                                     | 62 ± 18     | 64 ± 20      | 0.34    | 62 ± 18     | 64 ± 20      | 0.06    |
| Total cholesterol, mmol/l                           | 5.47 ± 1.19 | 5.20 ± 1.28  | 0.02    | 5.46 ± 1.19 | 5.49 ± 1.35  | 0.75    |
| HDL cholesterol, mmol/l                             | 1.28 ± 0.38 | 1.16 ± 0.36  | 0.001   | 1.29 ± 0.38 | 1.217 ± 0.34 | <0.0001 |
| Triglycerides, mmol/l*                              | 1.76 [1.30] | 1.77 [1.11]  | 0.69    | 1.75 [1.29] | 1.85 [1.58]  | 0.06    |
| Plasma copeptin, pmol/l*                            | 7.07 [7.22] | 9.43 [12.63] | <0.0001 | 7.06 [7.17] | 8.53 [9.52]  | 0.0008  |
| Plasma creatinine, µmol/l*                          | 87 [30]     | 97 [45]      | <0.0001 | 87 [30]     | 95 [37]      | <0.0001 |
| eGFR, ml/min/1.73 m <sup>2</sup>                    | 74 ± 20     | 65 ± 26      | <0.0001 | 74 ± 20     | 67 ± 23      | <0.0001 |
| UAC, mg/l                                           | 60 (128)    | 152 (453)    | <0.0001 | 60 [129]    | 97 [333]     | <0.0001 |
| UAC stages: Normoalbuminuria, n (%)                 | 622 (15)    | 17 (15)      |         | 606 (15)    | 33 (16)      |         |
| Microalbuminuria, n (%)                             | 2678 (63)   | 44 (40)      | <0.0001 | 2623 (63)   | 99 (49)      | <0.0001 |
| Macroalbuminuria, n (%)                             | 958 (22)    | 50 (45)      |         | 936 (22)    | 72 (35)      |         |
| Use of antiplatelet or anticoagulation drugs, n (%) | 1238 (29)   | 62 (56)      | <0.0001 | 1185 (28)   | 115 (56)     | <0.0001 |
| Use of lipid lowering drugs, n (%)                  | 1138 (27)   | 15 (14)      | 0.001   | 1098 (26)   | 55 (27)      | 0.87    |
| Use of blood pressure lowering drugs, n (%)         | 2761 (65)   | 93 (84)      | <0.0001 | 2691 (65)   | 163 (80)     | <0.0001 |
| Use of ACE-I or ARB, n (%)                          | 1003 (24)   | 63 (57)      | <0.0001 | 988 (234)   | 78 (38)      | <0.0001 |
| Use of diuretics, n (%)                             | 1262 (30)   | 56 (50)      | <0.0001 | 1235 (30)   | 83 (41)      | 0.001   |
| Use of insulin, n (%)                               | 804 (19)    | 52 (47)      | <0.0001 | 786 (19)    | 70 (34)      | <0.0001 |

Quantitative data expressed as mean ± SD or median [IQR]\*. Statistics are Student's t test, \*Wilcoxon test, Pearson's chi-squared test or Fisher's exact test. LLA: lower limb amputation. LLRV: lower limb revascularization. eGFR, estimated glomerular filtration rate. UAC: urinary albumin concentration. ACE-I: angiotensin converting enzyme inhibitor. ARB: angiotensin receptor blocker. p<0.05 was significant.

**Supplemental Table 2. Minor and major LLA during follow-up in the SURDIAGENE cohort by baseline plasma MR-proADM**

|                | Crude Model                |         | Adjusted Model 1           |         | Adjusted Model 2           |        |
|----------------|----------------------------|---------|----------------------------|---------|----------------------------|--------|
|                | Hazard Ratio<br>(95% C.I.) | P       | Hazard Ratio<br>(95% C.I.) | P       | Hazard Ratio<br>(95% C.I.) | P      |
| Minor LLA      |                            |         |                            |         |                            |        |
| T3 vs T1       | 5.52 (2.86 – 11.72)        | <0.0001 | 4.29 (2.03 – 9.79)         | <0.0001 | 3.78 (1.78 – 8.64)         | 0.0004 |
| T2 vs T1       | 2.18 (1.05 – 4.87)         | 0.04    | 1.93 (0.90 – 4.39)         | 0.09    | 1.79 (0.83 – 4.08)         | 0.14   |
| T3 vs T2       | 2.53 (1.49 – 4.42)         | 0.0005  | 2.22 (1.24 – 4.08)         | 0.007   | 2.11 (1.18 – 3.89)         | 0.01   |
| Log[MR-proADM] | 2.98 (1.82 – 4.50)         | <0.000  | 4.06 (1.67 – 9.64)         | 0.002   | 2.33 (0.92 – 5.74)         | 0.07   |
| Major LLA      |                            |         |                            |         |                            |        |
| T3 vs T1       | 4.64 (2.49 – 9.29)         | <0.0001 | 2.46 (1.20 – 5.33)         | 0.01    | 2.29 (1.11 – 4.99)         | 0.02   |
| T2 vs T1       | 2.23 (1.14 – 4.61)         | 0.02    | 1.77 (0.89 – 3.70)         | 0.11    | 1.65 (0.82 – 3.47)         | 0.16   |
| T3 vs T2       | 2.08 (1.26 – 3.52)         | 0.004   | 1.39 (0.78 – 2.52)         | 0.26    | 1.39 (0.77 – 2.53)         | 0.27   |
| Log[MR-proADM] | 1.90 (1.47 – 2.46)         | <0.0001 | 1.58 (1.11 – 2.28)         | 0.01    | 1.42 (1.00 – 2.05)         | 0.05   |

Minor LLA: transmetatarsal amputation. Major LLA: transtibial or transfemoral amputation. Hazards ratio (HR) for LLA computed by Cox proportional hazards survival regression analysis for tertiles (T) of plasma MR-ProADM and for 1 SD of log[MR-ProADM]. Model 1: adjusted for sex, age, BMI, duration of diabetes, arterial hypertension, tobacco smoking, HbA1c, total cholesterol, HDL-cholesterol, eGFR, UAC, use of insulin, ACE-I or ARB, diuretics, antiplatelet or anticoagulation drugs and lipid lowering drugs at baseline. Model 2: Model 1 plus adjustment for previous history of LLA at baseline. Number of participants with/without minor LLA by tertiles of MR-proADM: 2/467 (T1), 9/458 (T2) and 25/447 (T3). Number of participants with/without major LLA by tertiles of MR-proADM: 4/469 (T1), 13/462 (T2) and 24/446 (T3).

**Supplemental Table 3. Correlations of baseline parameters with incident LLA**

| Covariates                                   | Stepwise regression       |         | Univariate correlation |         |
|----------------------------------------------|---------------------------|---------|------------------------|---------|
|                                              | Cumulative R <sup>2</sup> | p       | R <sup>2</sup>         | p       |
| Previous LLA                                 | 0.096                     | <0.0001 | 0.089                  | <0.0001 |
| MR-proADM                                    | 0.133                     | <0.0001 | 0.075                  | <0.0001 |
| Sex: male                                    | 0.169                     | <0.0001 | 0.024                  | <0.0001 |
| Use of ACE-I or ARB                          | 0.177                     | 0.003   | 0.053                  | <0.0001 |
| HbA1c                                        | 0.185                     | 0.005   | 0.0007                 | 0.41    |
| Macroalbuminuria                             | 0.192                     | 0.008   | 0.029                  | <0.0001 |
| Use of diuretics                             | –                         | 0.11    | 0.020                  | <0.0001 |
| Cohort: SURDIAGENE                           | –                         | 0.11    | 0.063                  | <0.0001 |
| Total Cholesterol                            | –                         | 0.13    | 0.006                  | 0.01    |
| eGFR                                         | –                         | 0.19    | 0.030                  | <0.0001 |
| Tobacco smoking                              | –                         | 0.20    | 0.0005                 | 0.46    |
| Use of lipid lowering drugs                  | –                         | 0.27    | 0.011                  | 0.0008  |
| Use of antiplatelet or anticoagulation drugs | –                         | 0.39    | 0.032                  | <0.0001 |
| HDL cholesterol                              | –                         | 0.44    | 0.014                  | 0.0001  |
| Arterial hypertension                        | –                         | 0.70    | 0.019                  | <0.0001 |
| Use of insulin                               | –                         | 0.81    | 0.042                  | <0.0001 |
| BMI                                          | –                         | 0.85    | 0.0001                 | 0.70    |
| Use of anti-hypertensive drugs               | –                         | 0.89    | 0.019                  | <0.0001 |
| Duration of diabetes                         | –                         | 0.92    | 0.011                  | 0.0008  |
| Age                                          | –                         | 0.95    | 0.002                  | 0.13    |

Continuous parameters were normalized as Z-scores of log transformed data for these analyses.

**Supplemental Table 4. Prognostic value of baseline plasma MR-proADM for discrimination and classification of LLA risk during follow-up**

|                                                                     | <b>Estimate</b> | <b>95% Confidence Interval</b> | <b>p</b> |
|---------------------------------------------------------------------|-----------------|--------------------------------|----------|
| Harrell's c index for the basic model                               | 0.738           | 0.684 – 0.791                  | –        |
| Change in Harrell's c index for the basic model plus log[MR-proADM] | 0.046           | 0.012 – 0.081                  | 0.009    |
| Relative IDI                                                        | 0.109           | 0.051 – 0.161                  | <0.001   |
| Categorical NRI                                                     | 0.748           | 0.509 – 1.077                  | <0.0001  |

IDI: integrated discrimination improvement. NRI: net reclassification improvement. Basic model of traditional risk factors: sex, age, duration of diabetes, systolic and diastolic blood pressure, HbA1c, total cholesterol, HDL-cholesterol, eGFR, urinary albumin concentration and tobacco smoking at baseline. Relative (IDI) and categorical NRI tests were performed for 5-year risk of LLA associated with the basic model plus log[MR-proADM] compared to the basic model alone.  $p < 0.05$  was significant.

**Supplemental Table 5. Plasma MR-proADM at baseline by ADM genotype**

| SNP        | N    | MR-proADM<br>(nmol/l) | p      |
|------------|------|-----------------------|--------|
| rs4399321  |      |                       |        |
| AA         | 1798 | 0.60 ± 0.01           | 0.0007 |
| AG         | 1900 | 0.63 ± 0.01           |        |
| GG         | 467  | 0.65 ± 0.02           |        |
| rs11042725 |      |                       |        |
| CC         | 1180 | 0.60 ± 0.01           | 0.002  |
| CA         | 2066 | 0.62 ± 0.01           |        |
| AA         | 977  | 0.63 ± 0.01           |        |
| rs7944706  |      |                       |        |
| GG         | 1357 | 0.62 ± 0.01           | 0.004  |
| GA         | 2076 | 0.63 ± 0.01           |        |
| AA         | 823  | 0.59 ± 0.01           |        |
| rs2957692  |      |                       |        |
| AA         | 1441 | 0.60 ± 0.01           | 0.002  |
| AG         | 1913 | 0.63 ± 0.01           |        |
| GG         | 843  | 0.62 ± 0.01           |        |
| rs2957717  |      |                       |        |
| CC         | 1893 | 0.62 ± 0.01           | 0.59   |
| TC         | 1850 | 0.63 ± 0.01           |        |
| TT         | 427  | 0.58 ± 0.02           |        |

Data expressed as mean ± SEM. Comparisons between genotypes are ANCOVA adjusted for cohort membership, sex, age, duration of diabetes, HbA1c and eGFR. Statistics performed with log[MR-proADM].  $p \leq 0.05$  is significant.

**Supplemental Table 6. ADM genotype by LLA incidence during follow-up**

| SNP        | Incident LLA |            |
|------------|--------------|------------|
|            | No           | Yes        |
| rs4399321  |              |            |
| AA         | 1762 (0.434) | 36 (0.340) |
| AG         | 1846 (0.455) | 54 (0.509) |
| GG         | 451 (0.111)  | 16 (0.151) |
| MAF        | 0.339        | 0.406      |
| rs11042725 |              |            |
| CC         | 1153 (0.280) | 27 (0.246) |
| CA         | 2018 (0.491) | 48 (0.436) |
| AA         | 942 (0.229)  | 35 (0.318) |
| MAF        | 0.474        | 0.536      |
| rs7944706  |              |            |
| GG         | 1313 (0.317) | 44 (0.400) |
| GA         | 2030 (0.490) | 46 (0.418) |
| AA         | 803 (0.194)  | 20 (0.182) |
| MAF        | 0.438        | 0.391      |
| rs2957692  |              |            |
| AA         | 1410 (0.345) | 31 (0.290) |
| AG         | 1868 (0.457) | 45 (0.421) |
| GG         | 812 (0.199)  | 31 (0.290) |
| MAF        | 0.427        | 0.500      |
| rs2957717  |              |            |
| CC         | 1852 (0.456) | 41 (0.380) |
| TC         | 1799 (0.443) | 51 (0.472) |
| TT         | 411 (0.101)  | 16 (0.148) |
| MAF        | 0.323        | 0.384      |

Data expressed in number of cases and genotype frequency (1=100%).

SNPs are sorted in 5' to 3' order. MAF: minor allele frequency (1=100%).



**Supplemental Figure 1.** A) Structure of the *ADM* gene and location of the SNPs. B) Linkage disequilibrium between the SNPs in the DIABHYCAR cohort

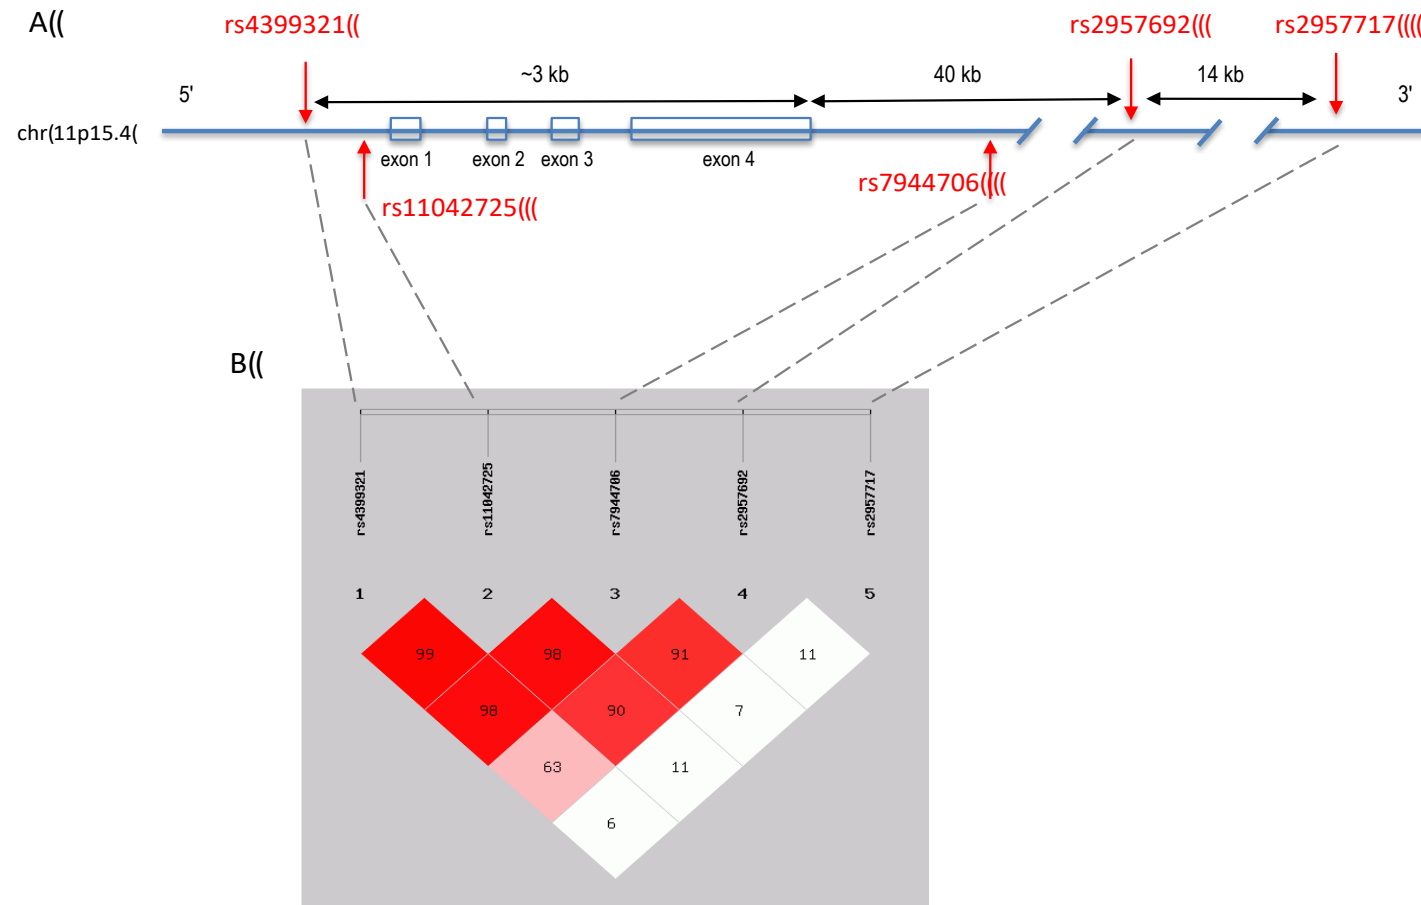

**Supplemental Figure 2.** Kaplan-Meier curves for the cumulative incidence of LLA during follow-up by *ADM* SNPs. Cox proportional hazards survival regression analyses adjusted for cohort membership, sex, age, duration of diabetes, arterial hypertension, tobacco smoking, HbA1c, total cholesterol, HDL-cholesterol, eGFR, UAC, use of insulin, ACE-I or ARB, diuretics, antiplatelet or anticoagulation drugs and lipid lowering drugs at baseline.

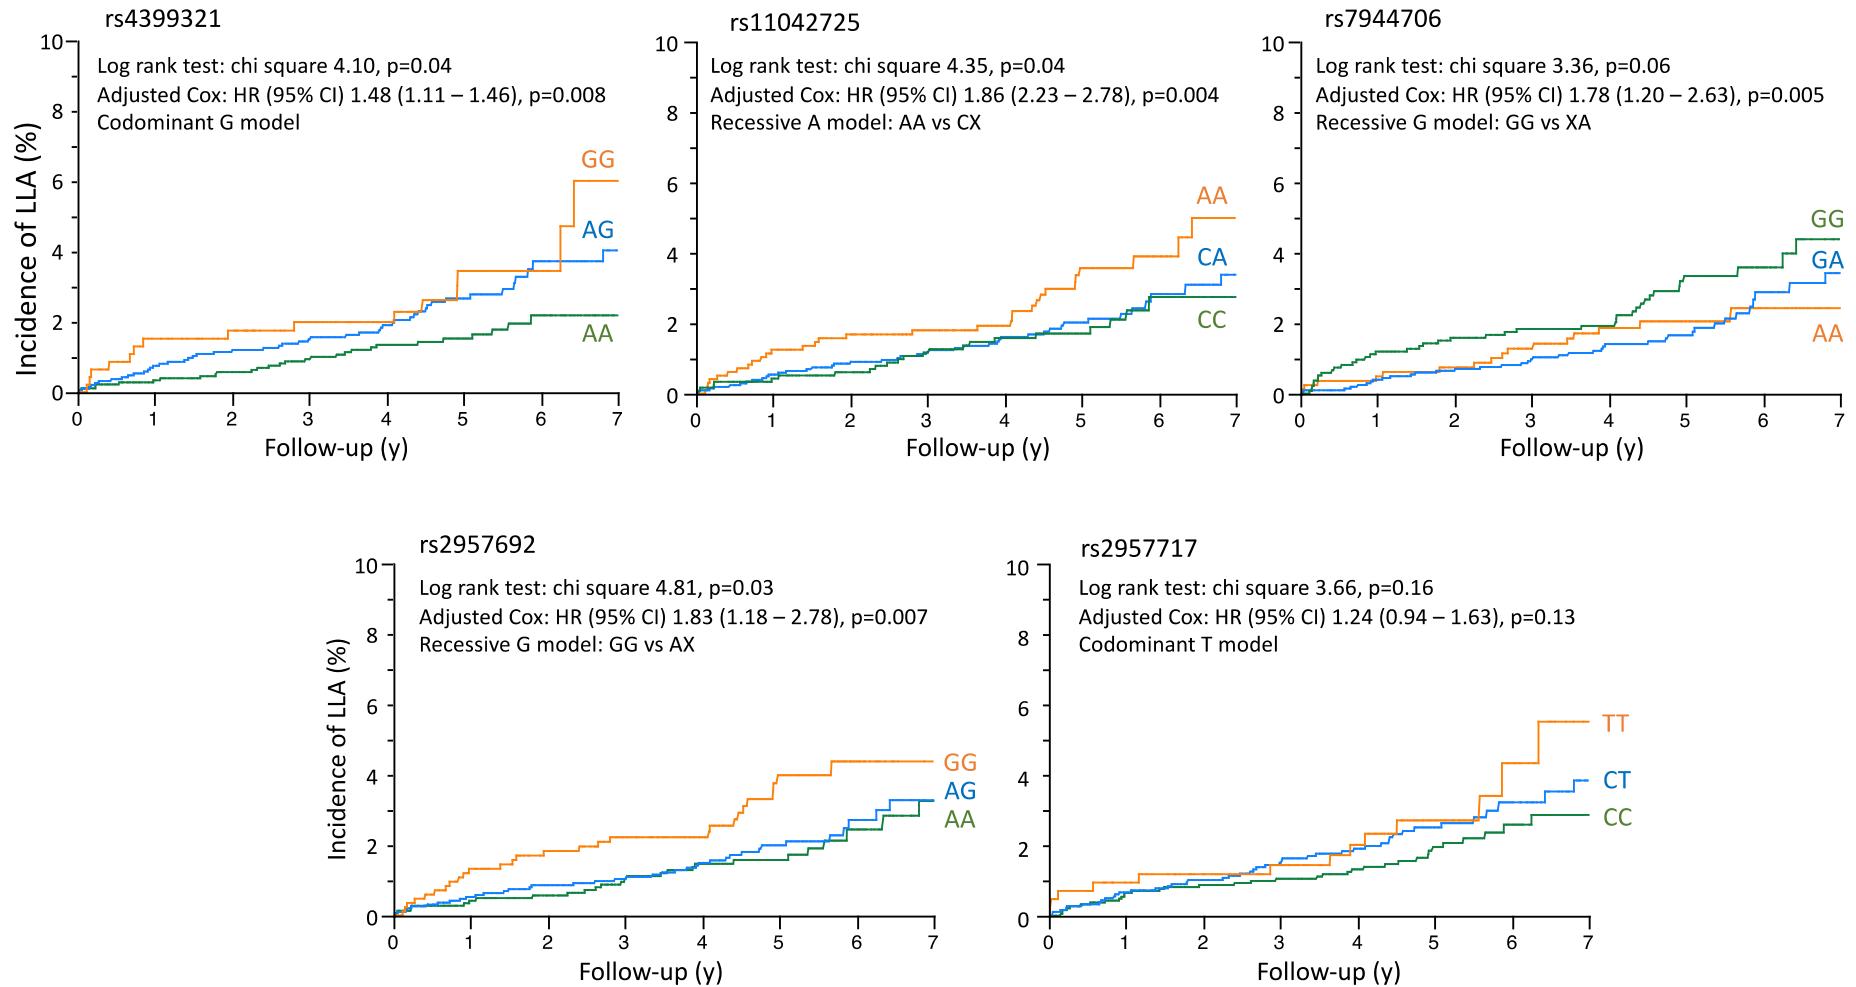

Supplement: Supplementary file 1 [file 34877934]
